# Supplementary material
Source: PubMed Central journal article supplement (PMC4317403)
Supplement: 11357_2015_9746_MOESM1_ESM.pdf [file 11357_2015_9746_MOESM1_ESM.pdf]

**Supplementary Table 1. Descriptive statistics and raw follicle counts**

**Authors:** Christina T. Cloutier<sup>1</sup>, James E. Coxworth<sup>1,2</sup>, Kristen Hawkes<sup>1\*</sup>

**Journal:** Age

**Paper Title:** Age-related decline in ovarian follicle stocks differ between chimpanzee (*Pan troglodytes*) and human females.

**Affiliations & Addresses:** <sup>1</sup>Department of Anthropology,  
University of Utah, Salt Lake City, UT USA

<sup>2</sup>Utah Population Database  
University of Utah, Salt Lake City, UT USA

**\*Correspondence:** hawkes@anthro.utah.edu  
270 S 1400 E, Room 102  
Salt Lake City, UT 84112  
801-581-6251 (phone)  
801-581-6252 (fax)

Table S1. Follicle Counts.

Means, standard deviations, confidence intervals and raw primordial follicle counts for each subject. Tissues for analysis were provided by the Yerkes National Primate Research Center, the Southwest National Primate Research Center, the New Iberia Research Center, the Keeling Center for Research, and Chimp Haven.

| Animal ID | Age | Mean Counts | Standard Deviation | Confidence Intervals* | Count 1 | Count 2 | Count 3 | Count 4 | Count 5 | Count 6 | Count 7 | Count 8 | Count 9 | Count 10 |
|-----------|-----|-------------|--------------------|-----------------------|---------|---------|---------|---------|---------|---------|---------|---------|---------|----------|
|           |     |             |                    |                       |         |         |         |         |         |         |         |         |         |          |
| 1         | 0   | 2659.0      | -                  | -                     | 2659    | -       | -       | -       | -       | -       | -       | -       | -       | -        |
| 2         | 0   | 2069.0      | 465.0              | 455.7                 | 2184    | 2547    | 1645    | 1900    | -       | -       | -       | -       | -       | -        |
| 3         | 0   | 1555.0      | -                  | -                     | 1555    | -       | -       | -       | -       | -       | -       | -       | -       | -        |
| 4         | 1   | 1326.0      | -                  | -                     | 1326    | -       | -       | -       | -       | -       | -       | -       | -       | -        |
| 5         | 5   | 777.5       | 36.3               | 35.6                  | 767     | 750     | 821     | 772     | -       | -       | -       | -       | -       | -        |
| 6         | 8   | 39.0        | 7.8                | 7.6                   | 31      | 33      | 48      | 44      | -       | -       | -       | -       | -       | -        |
| 7         | 8   | 1601.8      | 24.6               | 24.1                  | 1469    | 1620    | 1669    | 1649    | -       | -       | -       | -       | -       | -        |
| 8         | 9   | 648.0       | 64.6               | 63.3                  | 665     | 705     | 576     | 646     | -       | -       | -       | -       | -       | -        |
| 9         | 14  | 187.0       | -                  | -                     | 186     | 188     | -       | -       | -       | -       | -       | -       | -       | -        |
| 10        | 14  | 198.8       | 13.9               | 13.6                  | 210     | 211     | 186     | 188     | -       | -       | -       | -       | -       | -        |
| 11        | 15  | 38.0        | 1.2                | 1.1                   | 40      | 38      | 36      | 38      | -       | -       | -       | -       | -       | -        |
| 12        | 16  | 133.5       | -                  | -                     | 136     | 131     | -       | -       | -       | -       | -       | -       | -       | -        |
| 13        | 16  | 1627.5      | -                  | -                     | 1729    | 1526    | -       | -       | -       | -       | -       | -       | -       | -        |
| 14        | 17  | 701.8       | 19.1               | 18.7                  | 686     | 685     | 717     | 719     | -       | -       | -       | -       | -       | -        |
| 15        | 17  | 674.8       | 33.5               | 32.8                  | 670     | 665     | 650     | 714     | -       | -       | -       | -       | -       | -        |
| 16        | 19  | 2.0         | -                  | -                     | 2       | 2       | -       | -       | -       | -       | -       | -       | -       | -        |
| 17        | 19  | 163.0       | -                  | -                     | 163     | -       | -       | -       | -       | -       | -       | -       | -       | -        |
| 18        | 21  | 99.0        | -                  | -                     | 57      | 141     | -       | -       | -       | -       | -       | -       | -       | -        |
| 19        | 21  | 1118.3      | 23.6               | 23.2                  | 1194    | 1120    | 1083    | 1076    | -       | -       | -       | -       | -       | -        |
| 20        | 22  | 96.3        | 22.6               | 25.6                  | 77      | 90      | 122     | -       | -       | -       | -       | -       | -       | -        |
| 21        | 22  | 122.0       | -                  | -                     | 122     | -       | -       | -       | -       | -       | -       | -       | -       | -        |
| 22        | 22  | 298.0       | -                  | -                     | 389     | 207     | -       | -       | -       | -       | -       | -       | -       | -        |
| 23        | 22  | 175.0       | -                  | -                     | 175     | -       | -       | -       | -       | -       | -       | -       | -       | -        |
| 24        | 24  | 25.3        | 0.6                | 0.6                   | 28      | 24      | 24      | 25      | -       | -       | -       | -       | -       | -        |
| 25        | 24  | 179.8       | 6.6                | 6.4                   | 200     | 172     | 180     | 167     | -       | -       | -       | -       | -       | -        |
| 26        | 24  | 173.5       | -                  | -                     | 180     | 167     | -       | -       | -       | -       | -       | -       | -       | -        |
| 27        | 25  | 27.0        | -                  | -                     | 27      | -       | -       | -       | -       | -       | -       | -       | -       | -        |
| 28        | 25  | 85.0        | 32.8               | 22.7                  | 86      | 99      | 126     | 130     | 59      | 59      | 61      | 60      | -       | -        |
| 29        | 26  | 349.5       | 9.2                | 9.1                   | 361     | 351     | 351     | 335     | -       | -       | -       | -       | -       | -        |
| 30        | 26  | 37.0        | -                  | -                     | 37      | -       | -       | -       | -       | -       | -       | -       | -       | -        |
| 31        | 27  | 153.4       | 46.6               | 32.3                  | 202     | 233     | 117     | 169     | 108     | 95      | 152     | 151     | -       | -        |
| 32        | 27  | 38.3        | 5.8                | 5.7                   | 41      | 44      | 34      | 34      | -       | -       | -       | -       | -       | -        |
| 33        | 27  | 36.5        | -                  | -                     | 36      | 37      | -       | -       | -       | -       | -       | -       | -       | -        |
| 34        | 27  | 266.5       | 2.1                | 2.0                   | 260     | 268     | 271     | 267     | -       | -       | -       | -       | -       | -        |
| 35        | 28  | 179.0       | 7.4                | 7.2                   | 186     | 171     | 174     | 185     | -       | -       | -       | -       | -       | -        |
| 36        | 29  | 21.3        | 4.6                | 3.2                   | 17      | 17      | 22      | 20      | 18      | 20      | 26      | 30      | -       | -        |
| 37        | 29  | 39.8        | 2.5                | 2.5                   | 35      | 39      | 41      | 44      | -       | -       | -       | -       | -       | -        |
| 38        | 30  | 40.5        | 5.1                | 5.0                   | 44      | 45      | 35      | 38      | -       | -       | -       | -       | -       | -        |
| 39        | 30  | 156.5       | 17.2               | 16.9                  | 132     | 146     | 168     | 180     | -       | -       | -       | -       | -       | -        |
| 40        | 31  | 421.8       | 62.9               | 61.7                  | 365     | 368     | 478     | 476     | -       | -       | -       | -       | -       | -        |
| 41        | 31  | 62.3        | 10.7               | 10.5                  | 70      | 72      | 54      | 53      | -       | -       | -       | -       | -       | -        |
| 42        | 31  | 106.0       | -                  | -                     | 108     | 104     | -       | -       | -       | -       | -       | -       | -       | -        |
| 43        | 31  | 6.3         | 1.0                | 1.0                   | 7       | 6       | 5       | 7       | -       | -       | -       | -       | -       | -        |
| 44        | 31  | 43.6        | 7.5                | 5.2                   | 26      | 37      | 48      | 44      | 45      | 38      | 57      | 54      | -       | -        |
| 45        | 34  | 98.0        | -                  | -                     | 100     | 96      | -       | -       | -       | -       | -       | -       | -       | -        |
| 46        | 34  | 447.3       | 19.7               | 19.3                  | 443     | 434     | 471     | 441     | -       | -       | -       | -       | -       | -        |
| 47        | 35  | 17.0        | -                  | -                     | 8       | 26      | -       | -       | -       | -       | -       | -       | -       | -        |
| 48        | 35  | 18.0        | -                  | -                     | 17      | 19      | -       | -       | -       | -       | -       | -       | -       | -        |
| 49        | 35  | 4.8         | 6.0                | 5.9                   | 0       | 0       | 12      | 7       | -       | -       | -       | -       | -       | -        |
| 50        | 36  | 21.0        | -                  | -                     | 27      | 15      | -       | -       | -       | -       | -       | -       | -       | -        |
| 51        | 38  | 104.7       | 68.6               | 77.6                  | 119     | 146     | 49      | -       | -       | -       | -       | -       | -       | -        |
| 52        | 38  | 49.5        | 2.1                | 2.0                   | 41      | 53      | 50      | 54      | -       | -       | -       | -       | -       | -        |
| 53        | 38  | 13.5        | -                  | -                     | 14      | 13      | -       | -       | -       | -       | -       | -       | -       | -        |
| 54        | 38  | 6.0         | -                  | -                     | 6       | -       | -       | -       | -       | -       | -       | -       | -       | -        |
| 55        | 38  | 22.0        | -                  | -                     | 22      | -       | -       | -       | -       | -       | -       | -       | -       | -        |
| 56        | 40  | 0.0         | -                  | -                     | 0       | 0       | 0       | 0       | -       | -       | -       | -       | -       | -        |
| 57**      | 41  | 3.9         | 2.9                | 1.4                   | 3       | 2       | 6       | 10      | 1       | 2       | 3       | 2       | 0       | 0        |
| 58        | 42  | 129.3       | 5.5                | 5.4                   | 153     | 127     | 116     | 121     | -       | -       | -       | -       | -       | -        |
| 59        | 43  | 9.3         | 3.1                | 3.0                   | 8       | 7       | 9       | 13      | -       | -       | -       | -       | -       | -        |
| 60        | 44  | 20.5        | 9.3                | 6.4                   | 19      | 15      | 13      | 15      | 34      | 33      | 22      | 13      | -       | -        |
| 61        | 45  | 58.0        | -                  | -                     | 58      | -       | -       | -       | -       | -       | -       | -       | -       | -        |
| 62        | 46  | 15.0        | -                  | -                     | 12      | 18      | -       | -       | -       | -       | -       | -       | -       | -        |
| 63        | 47  | 0.2         | 0.4                | 0.3                   | 0       | 0       | 1       | 0       | 0       | 1       | 0       | 0       | 0       | 0        |
| 64        | 49  | 14.1        | 5.4                | 3.7                   | 20      | 20      | 14      | 15      | 5       | 7       | 15      | 17      | -       | -        |
| 65        | 51  | 0.0         | -                  | -                     | 0       | 0       | -       | -       | -       | -       | -       | -       | -       | -        |
| 66        | 54  | 146.5       | 20.5               | 20.1                  | 157     | 163     | 144     | 122     | -       | -       | -       | -       | -       | -        |
| 67        | 56  | 4.3         | 1.1                | 1.1                   | 4       | 3       | 5       | 5       | -       | -       | -       | -       | -       | -        |

\*95% confidence intervals, mean ±

\*\*For subject 57, five additional counts contributed to the mean, SD, and CI. They were 4, 4, 7, 6, 7, 5.
